# Supplementary material for: Stepwise Method and Factor Scoring in Multiple Regression Analysis of Cashmere Production in Liaoning Cashmere Goats
Source: MDPI journal article supplement (doi:10.3390/ani12151886), 2022-07-23
Supplement: s1 [file s1]

**Table S1.** F test statistic.

| <b>Traits</b>              | <b>Mean Square</b> | <b>F</b> | <b>P</b> |
|----------------------------|--------------------|----------|----------|
| <b>BSL (X<sub>1</sub>)</b> | 2123.790           | 2.324    | 0.000    |
| <b>BH (X<sub>2</sub>)</b>  | 2063.358           | 2.464    | 0.000    |
| <b>CC (X<sub>3</sub>)</b>  | 2604.759           | 4.023    | 0.000    |
| <b>PC (X<sub>4</sub>)</b>  | 10411.811          | 13.010   | 0.000    |
| <b>CD (X<sub>5</sub>)</b>  | 2244.017           | 2.744    | 0.000    |
| <b>CW (X<sub>6</sub>)</b>  | 2652.791           | 3.618    | 0.000    |
| <b>HB (X<sub>7</sub>)</b>  | 4597.651           | 9.835    | 0.000    |
| <b>BW (X<sub>8</sub>)</b>  | 2001.650           | 3.888    | 0.000    |

Note: F: F text, P: significant.
